# Supplementary material for: Postoperative Nausea and Vomiting According to Target-Controlled or Manual Remifentanil Infusion in Gynecological Patients Undergoing Pelviscopic Surgery: A Randomized Controlled Trial
Source: MDPI journal article supplement (doi:10.3390/jpm13020176), 2023-01-19
Supplement: s1 [file s1]

**Table S1.** Perioperative heart rate at different stages.

|                              | TCI         | Manual      | P-value |
|------------------------------|-------------|-------------|---------|
| Initial                      | 73.7 ± 15.5 | 75.7 ± 14.9 | 0.539   |
| Before intubation            | 79.2 ± 11.5 | 78.2 ± 12.7 | 0.709   |
| 3 min after intubation       | 81.7 ± 11.5 | 86.5 ± 11.1 | 0.046*  |
| Skin incision                | 83.3 ± 13.2 | 83.6 ± 10.7 | 0.898   |
| CO <sub>2</sub> insufflation | 79.5 ± 12.6 | 81.6 ± 11.7 | 0.417   |
| Specimen removal             | 71.2 ± 8.6  | 72.8 ± 12.8 | 0.490   |
| Skin suture                  | 68.0 ± 8.9  | 69.8 ± 10.6 | 0.393   |
| PACU                         | 82.2 ± 13.4 | 81.0 ± 14.8 | 0.683   |

Data denote means ± standard deviations. \* Statistical significance. TCI, target-controlled infusion; CO<sub>2</sub>, carbon dioxide; PACU, post-anesthetic care unit.

**Table S2.** Perioperative blood pressure at different stages.

|                              | TCI          | Manual       | P-value |
|------------------------------|--------------|--------------|---------|
| Systolic blood pressure      |              |              |         |
| Initial                      | 140.7 ± 21.0 | 140.2 ± 21.7 | 0.915   |
| Before intubation            | 122.2 ± 16.7 | 121.0 ± 17.1 | 0.737   |
| 3 min after intubation       | 114.4 ± 21.4 | 119.0 ± 18.1 | 0.275   |
| Skin incision                | 109.5 ± 21.4 | 113.2 ± 13.9 | 0.344   |
| CO <sub>2</sub> insufflation | 115.3 ± 16.1 | 113.7 ± 16.5 | 0.657   |
| Specimen removal             | 111.0 ± 12.3 | 110.7 ± 13.2 | 0.908   |
| Skin suture                  | 108.0 ± 11.3 | 109.1 ± 10.9 | 0.625   |
| PACU                         | 133.2 ± 22.4 | 124.3 ± 21.6 | 0.058   |
| Mean blood pressure          |              |              |         |
| Initial                      | 104.4 ± 14.4 | 102.5 ± 15.3 | 0.558   |
| Before intubation            | 91.4 ± 14.1  | 89.9 ± 14.4  | 0.606   |
| 3 min after intubation       | 82.5 ± 17.2  | 90.2 ± 16.7  | 0.035*  |
| Skin incision                | 81.8 ± 14.6  | 85.3 ± 13.6  | 0.249   |
| CO <sub>2</sub> insufflation | 86.0 ± 13.7  | 86.0 ± 13.6  | 0.994   |
| Specimen removal             | 81.6 ± 12.5  | 83.4 ± 11.1  | 0.477   |
| Skin suture                  | 79.2 ± 10.5  | 81.5 ± 10.6  | 0.299   |
| PACU                         | 97.6 ± 15.8  | 90.5 ± 17.8  | 0.050   |
| Diastolic blood pressure     |              |              |         |
| Initial                      | 87.2 ± 12.8  | 85.4 ± 12.0  | 0.499   |
| Before intubation            | 78.2 ± 12.8  | 75.3 ± 13.0  | 0.285   |
| 3 min after intubation       | 69.4 ± 15.4  | 78.3 ± 16.6  | 0.010*  |
| Skin incision                | 70.1 ± 15.7  | 74.3 ± 14.1  | 0.182   |
| CO <sub>2</sub> insufflation | 74.2 ± 12.4  | 75.5 ± 14.5  | 0.643   |
| Specimen removal             | 70.1 ± 13.2  | 71.5 ± 11.1  | 0.590   |
| Skin suture                  | 66.7 ± 10.9  | 69.6 ± 9.9   | 0.189   |
| PACU                         | 79.4 ± 15.0  | 73.1 ± 17.1  | 0.069   |

Data denote means ± standard deviations. \* Statistical significance. TCI, target-controlled infusion; CO<sub>2</sub>, carbon dioxide; PACU, post-anesthetic care unit.
